# Supplementary material
Source: PubMed Central journal article supplement (PMC9555606)
Supplement: inf-41-0919-s001.pdf [file inf-41-0919-s001.pdf]

## Methods

### Determination of lymphocyte subsets by flow cytometry

For determination of T cell subsets within the CD4<sup>+</sup> and CD8<sup>+</sup> cells, 100 µl of whole blood collected with EDTA was stained during 15 min at room temperature with the corresponding mAb. The following fluorochrome-labeled mAbs were used: PerCP/Cy5.5-anti-CD4 (SK3), APC-H7-anti-CD8 (SK1), FITC-anti-CD45RA (L48), V450-anti-CD27 (MT271), PE-anti-HLA-DR (TU36), and BV510-anti-PD1 (EH12.1). After red blood cells lysis using FACS Lysing Solution (BD) for 7 min, cells were washed twice with PBS/BSA and acquired. After gating on CD3<sup>+</sup> cells, subsets within the CD4<sup>+</sup> and CD8<sup>+</sup> cells were defined as naïve T cells (CD45RA<sup>+</sup>CD27<sup>+</sup>), central memory T cells (T<sub>CM</sub>, CD45RA<sup>-</sup>CD27<sup>+</sup>) and effector memory T cells (T<sub>EM</sub>, CD45RA<sup>-</sup>CD27<sup>-</sup>). Activated CD4<sup>+</sup> and CD8<sup>+</sup> T cells were characterized as HLA-DR<sup>+</sup> cells and exhausted T cells were defined as PD1<sup>+</sup> cells. Cells were acquired in a FACSCanto II flow cytometer (BD) and analyzed using the FlowJo software v10.0.7 (Treestar, Inc.).
