# Supplementary material
Source: PubMed Central journal article supplement (PMC9555606)
Supplement: inf-41-0919-s002.pdf [file inf-41-0919-s002.pdf]

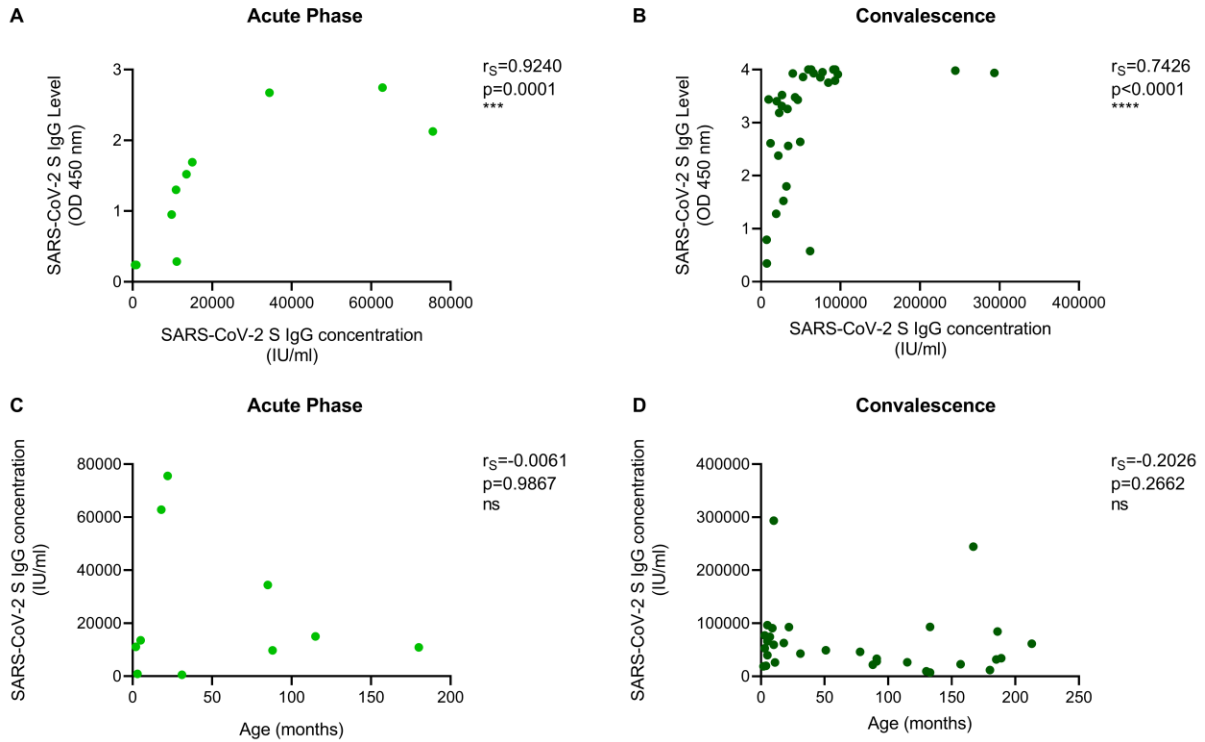

**Associations between SARS-CoV-2 IgG responses and patient age in children with COVID-**

**19.** Correlation between serum IgG levels against SARS-CoV-2 S protein (measured as OD at 450 nm) and SARS-CoV-2 S IgG concentrations in (A) acute phase and (B) convalescence.

Correlation between serum SARS-CoV-2 S IgG concentrations and patient age in (C) acute phase and (D) convalescence.  $r_s$ , Spearman correlation coefficient. A  $P$  value  $<0.05$  was considered

significant; \*\*\*  $P<0.001$ , \*\*\*\*  $P<0.0001$ .
