# Supplementary material
Source: PubMed Central journal article supplement (PMC9555606)
Supplement: inf-41-0919-s003.pdf [file inf-41-0919-s003.pdf]

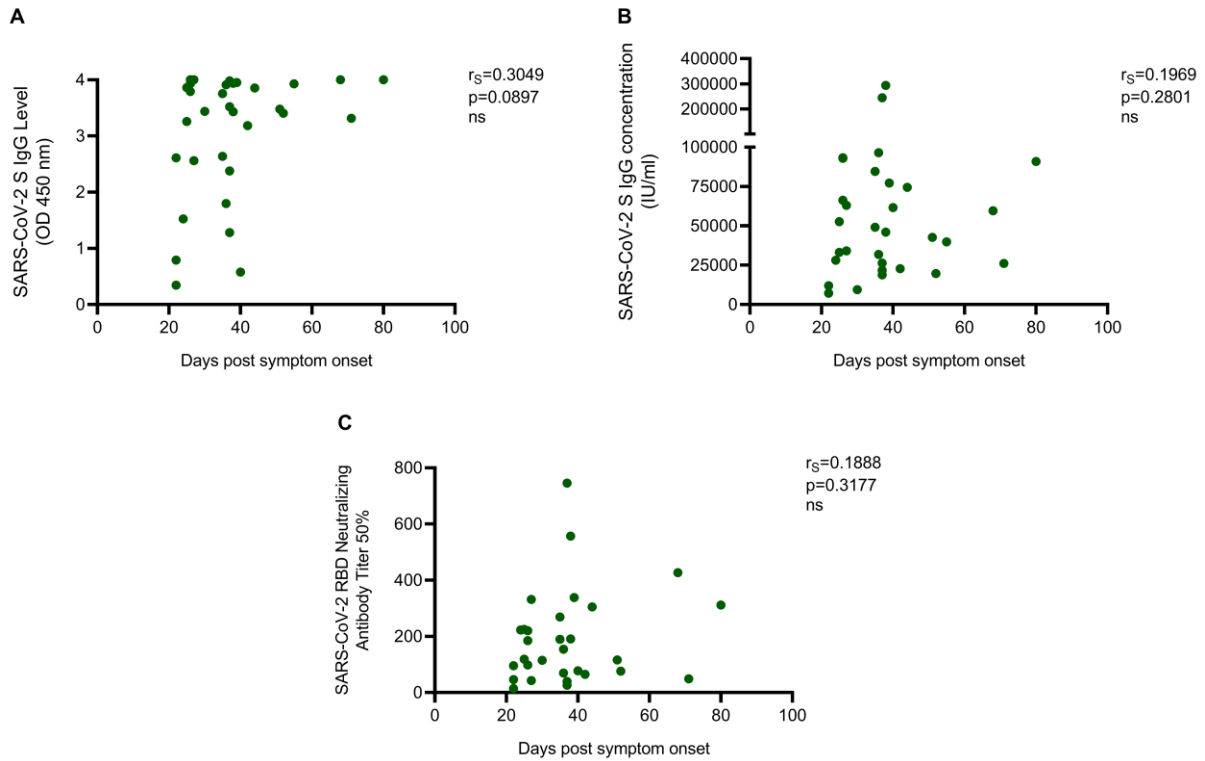

**SARS-CoV-2 IgG responses in pediatric patients with COVID-19.** Correlations between serum (A) SARS-CoV-2 S IgG levels (measured as OD at 450 nm), (B) SARS-CoV-2 S IgG concentrations (measured as IU/ml) and (C) SARS-CoV-2 RBD neutralizing antibody titers (measured as the reciprocal of the dilution of serum that inhibited by 50% RBD-ACE2 interaction in a surrogate Virus Neutralization Test) with days' post-symptom onset.  $r_s$ , Spearman correlation coefficient. A  $P$  value  $<0.05$  was considered significant; ns, non-significant.
