# Supplementary material
Source: PubMed Central journal article supplement (PMC9555606)
Supplement: inf-41-0919-s004.pdf [file inf-41-0919-s004.pdf]

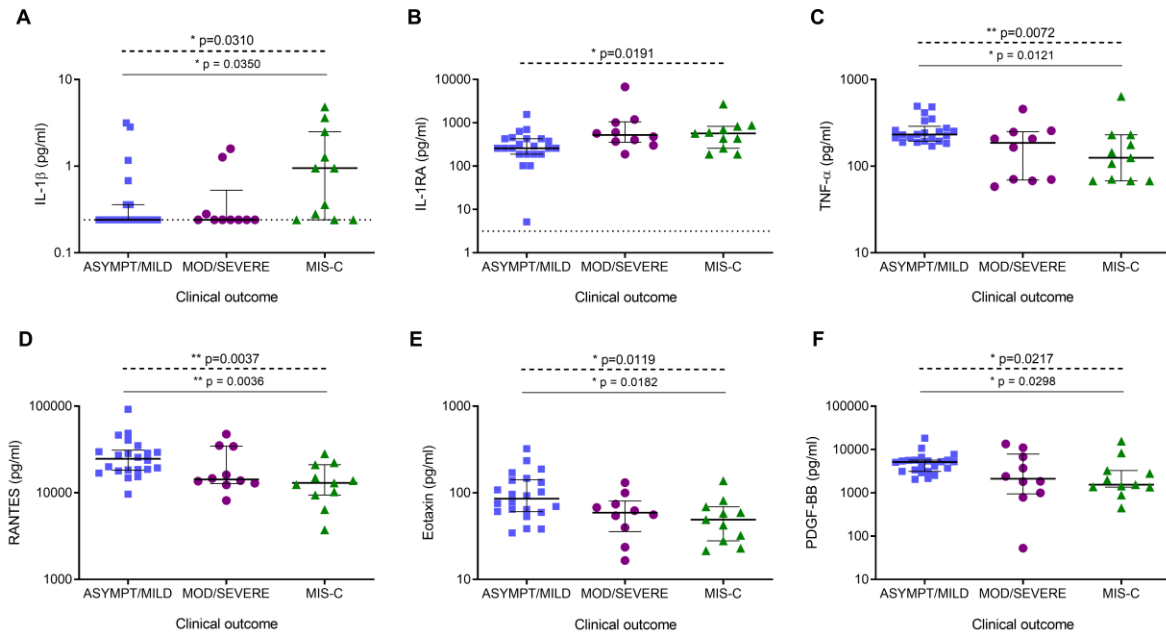

**Cytokines associated with SARS-CoV-2 infection in children.** (A) IL-1 $\beta$ , (B) IL-1RA, (C) TNF- $\alpha$ , (D) RANTES, (E) eotaxin, and (F) PDGF-BB were measured in serum samples from children with differing severity of COVID-19, during the acute phase of the disease (for asymptomatic/mild and moderate/severe subgroups) or during MIS-C. Lines represent median values with interquartile range. Lower dotted lines indicate minimum detectable levels for each cytokine. For IL-1 $\beta$ , IL-1RA, TNF- $\alpha$ , RANTES, eotaxin, and PDGF-BB, the minimum detectable levels were 0.24 pg/ml, 3.16 pg/ml, 1.13 pg/ml, 3.98 pg/ml, 0.05 pg/ml, and 2.96 pg/ml, respectively. *P* values were calculated using the Kruskal-Wallis test (dashed line) and Dunn's multiple comparison post-test (solid line). A *P* value <0.05 was considered significant; \* *P*<0.05, \*\* *P*<0.01. *P* values showing significant post-test comparisons are displayed. ASYMPT, asymptomatic; MOD, moderate; MIS-C, multisystem inflammatory syndrome in children.
