# Supplementary material
Source: PubMed Central journal article supplement (PMC9555606)
Supplement: inf-41-0919-s005.pdf [file inf-41-0919-s005.pdf]

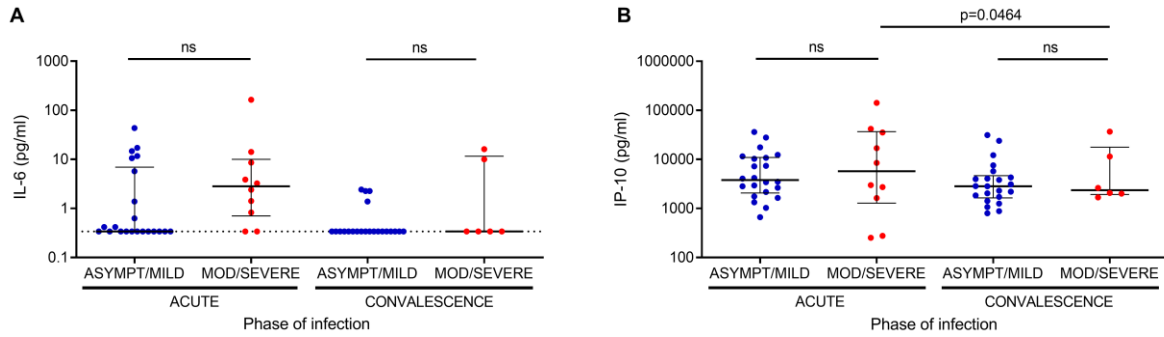

**Acute and convalescent serum cytokine levels in children with SARS-CoV-2 infection.** (A) IL-6 and (B) IP-10 were measured in serum samples from children with COVID-19 during the acute phase of the disease and during convalescence. Lines represent median values with interquartile range. Lower dotted lines indicate minimum detectable levels for each cytokine. For IL-6 and IP-10 the minimum detectable levels were 0.34 pg/ml and 1.43 pg/ml, respectively. *P* values were calculated using the Wilcoxon matched pairs test for comparisons between acute phase and convalescence. *P* values < 0.05 are shown. *P* values were calculated using the Mann-Whitney test for comparisons between the severity groups. A *P* value <0.05 was considered significant. ns, non-significant. ASYMPT, asymptomatic; MOD, moderate.
